# Supplementary material for: Investigating the optimum size of nanoparticles for their delivery into the brain assisted by focused ultrasound-induced blood–brain barrier opening
Source: PubMed Central journal article supplement (PMC7588485; doi:10.1038/s41598-020-75253-9), 2020-10-26
Supplement: 41598_2020_75253_MOESM1_ESM.pdf [file 41598_2020_75253_MOESM1_ESM.pdf]

## Supplementary Information

# Investigating the optimum size of nanoparticles for their delivery into the brain assisted by focused ultrasound-induced blood–brain barrier opening

Seiichi Ohta,<sup>1\*</sup> Emi Kikuchi,<sup>2</sup> Ayumu Ishijima,<sup>3</sup> Takashi Azuma,<sup>1,2</sup> Ichiro Sakuma,<sup>2,3</sup> Taichi Ito<sup>1,2</sup>

1 Center for Disease Biology and Integrative Medicine, The University of Tokyo, 7-3-1 Hongo, Bunkyo-ku, Tokyo 113-8655, Japan

2 Department of Bioengineering, The University of Tokyo, 7-3-1 Hongo, Bunkyo-ku, Tokyo 113-8656, Japan

3 Department of Precision Engineering, The University of Tokyo, 7-3-1 Hongo, Bunkyo-ku, Tokyo 113-8656, Japan

\* Corresponding author

E-mail: [s-ohta@sogo.t.u-tokyo.ac.jp](mailto:s-ohta@sogo.t.u-tokyo.ac.jp)

Current address: Institute of Engineering Innovation, The University of Tokyo, 7-3-1 Hongo, Bunkyo-ku, Tokyo 113-8656, Japan

# Table of Contents

## Supporting Methodology

|                                                                   |   |
|-------------------------------------------------------------------|---|
| Modeling of closing kinetics of opened BBB gaps .....             | 3 |
| Modeling of size-dependent blood half-lives of nanoparticles..... | 3 |
| Parameters used for the model calculation .....                   | 4 |

## Supporting Figures and Tables

|                                                                                                                                                                                                                                                                        |    |
|------------------------------------------------------------------------------------------------------------------------------------------------------------------------------------------------------------------------------------------------------------------------|----|
| Figure S1. Apparatus for the FUS-induced enhancement of BBB permeability to nanoparticles in vitro .....                                                                                                                                                               | 5  |
| Figure S2. Ultrasound beam profile at the bottom of the well for the <i>in vitro</i> FUS-exposure setup. ....                                                                                                                                                          | 5  |
| Figure S3. Time change of TEER induced by FUS exposure without MBs .....                                                                                                                                                                                               | 6  |
| Figure S4. Hydrodynamic size distribution of the synthesized AuNPs as measured by DLS.....                                                                                                                                                                             | 6  |
| Figure S5. Cell viability of HUVECs incubated with 3, 15, and 120 nm AuNPs for 24h. ....                                                                                                                                                                               | 7  |
| Figure S6. The quantity of 3, 15, and 120 nm AuNPs that permeated through the <i>in vitro</i> BBB model following FUS exposure without MBs.....                                                                                                                        | 7  |
| Figure S7. Apparatus for <i>in vivo</i> BBB opening via intracranial FUS exposure.....                                                                                                                                                                                 | 8  |
| Figure S8. An ultrasound beam profile for the <i>in vivo</i> FUS exposure setup. (a) Apparatus used for the ultrasound beam profile measurement. (b) An ultrasound beam profile obtained by the measurement. Definitions of the X, Y, and Z axes are shown in (a)..... | 9  |
| Figure S9. Brain sections of mice subjected to FUS with higher MB doses ( $3.0 \times 10^8$ bubbles/mouse). ....                                                                                                                                                       | 10 |
| Figure S10. Severe bleeding following FUS exposure with acoustic pressure and/or an MB dose that was too high .....                                                                                                                                                    | 10 |
| Figure S11. The effect of acoustic pressure on the amount of 3 nm AuNPs delivered into the brain assisted by FUS-induced BBB opening.....                                                                                                                              | 11 |
| Figure S12. The amount of 3, 15, and 120 nm AuNPs delivered into the brain assisted by FUS-induced BBB opening with an MB dose ( $3.0 \times 10^8$ bubbles/mouse).....                                                                                                 | 11 |
| Figure S13. Effect of $k_{rg}$ and $A_{k0}$ on the size-dependent BBB permeation of AuNPs.....                                                                                                                                                                         | 12 |
| Figure S14. Previously reported data and theoretical fitting of size-dependent blood half-lives of nanoparticles in mice. ....                                                                                                                                         | 12 |
| Figure S15. Effect of (a) $k_{rg}$ and (b) $A_{k0}$ on the size-dependent delivery of nanoparticles into the brain when assisted by FUS .....                                                                                                                          | 13 |
| Table S1 Summary of the characterization of synthesized AuNPs .....                                                                                                                                                                                                    | 14 |
| Table S2. Summary of parameters used for the model calculation .....                                                                                                                                                                                                   | 14 |

## Supporting Methodologies

### Modeling of closing kinetics of opened BBB gaps

Experimentally, it was difficult to observe changes over time in the size of the gaps that opened in the BBB,  $r_g$ , so we assumed a simple first-order kinetic law to describe the closing kinetics of the gaps as follows:

$$r_g = r_{g0} \exp(-k_{rg} t) \quad (\text{eq. S1})$$

, where  $r_{g0}$  and  $k_{rg}$  represent the size of the BBB gaps that opened immediately after FUS exposure and the rate constant for the gap closing, respectively.

Accompanying the decrease in  $r_g$ , the pore density,  $A_k$  also decreases over time. Assuming that the number of pores,  $N$ , does not change during the recovery and that the size of each gap decreases equally following eq. S1, the changes in  $A_k$  can be described as follows:

$$\begin{aligned} A_k &= \frac{N\pi r_g^2}{A_m} = \frac{N\pi (r_{g0} \exp(-k_{rg} t))^2}{A_m} = \frac{N\pi r_{g0}^2}{A_m} \exp(-2k_{rg} t) \\ &= A_{k0} \exp(-2k_{rg} t) \end{aligned} \quad (\text{eq. S2})$$

, where  $A_m$  and  $A_{k0}$  are the total area of the cellular sheet and the pore density immediately after FUS exposure, respectively. Since TEER recovered to the initial value in ca. 4 h (Figure 2b),  $k_{rg}$  was determined to be  $5.6 \times 10^{-5} \text{ s}^{-1}$ , so that  $A_k$  becomes 20% of  $A_{k0}$  after 4 h.

### Modeling of size-dependent blood half-lives of nanoparticles

We compiled previously reported blood half-lives of PEGylated nanoparticles, regardless of the type of materials used, <sup>1-5</sup> and then plotted against their size (Figure S13). It was found that the size-dependency of the blood half-lives of particles can be fitted with the following two master curves:

$$\tau_1 = a_1 \exp(b_1 t) \quad (\text{eq. S3})$$

$$\tau_2 = a_2 \exp(-b_2 t) \quad (\text{eq. S4})$$

, where  $\tau_1$  corresponds to blood half-lives which are dominated by renal clearance, while  $\tau_2$  corresponds to blood half-lives which are dominated by RES uptake.  $a_1$ ,  $a_2$ ,  $b_1$ , and  $b_2$  are the

fitting parameters.  $a_1 = 2.0 \times 10^{-3}$  [s],  $a_2 = 4.0 \times 10$  [s],  $b_1 = 1.4$  [ $s^{-1}$ ], and  $b_2 = 2.2 \times 10^{-2}$  [ $s^{-1}$ ] were obtained by fitting eqs. S3 and S4 to the experimental data using the least square method (Figure S13). For each particle size,  $\tau_1$  and  $\tau_2$  were calculated and then the smaller of the values was used as the blood half-life,  $\tau(r_{NP})$ . By using  $\tau(r_{NP})$  obtained in this way, a size-dependent elimination-rate constant  $k_{el}(r_{NP})$  could be calculated as follows:

$$k(r_{NP}) = \frac{\ln 2}{\tau(r_{NP})} \quad (\text{eq. S5})$$

### **Parameters used for the model calculation**

Parameters used for the model calculation are summarized in Table S2.

## Supporting Figures and Tables

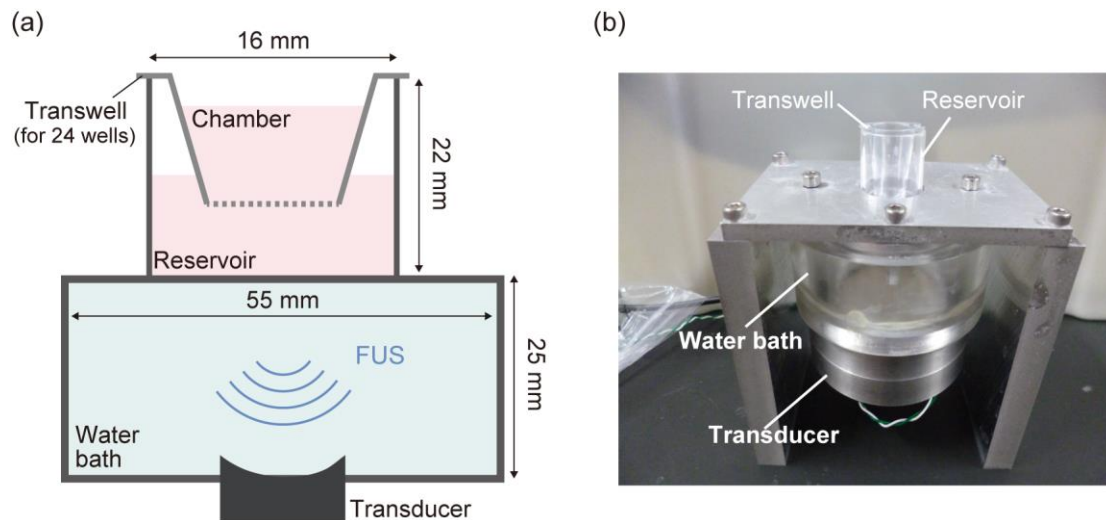

Figure S1. (a) A schematic diagram and (b) a photograph of the apparatus used for the evaluation of FUS-induced enhancement of BBB permeability to nanoparticles *in vitro*.

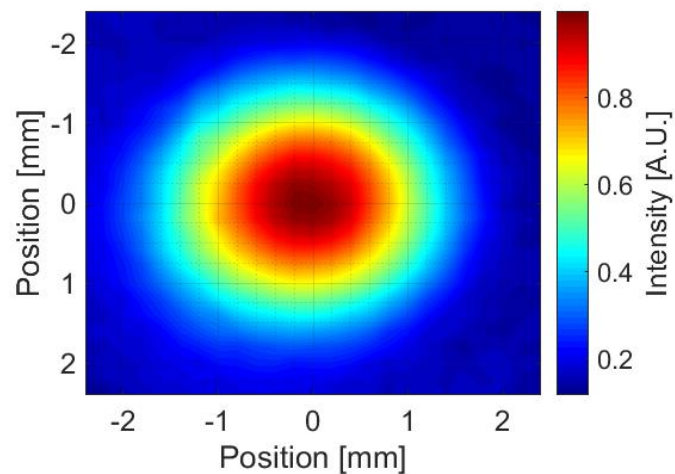

Figure S2. Ultrasound beam profile at the bottom of the well for the *in vitro* FUS-exposure setup.

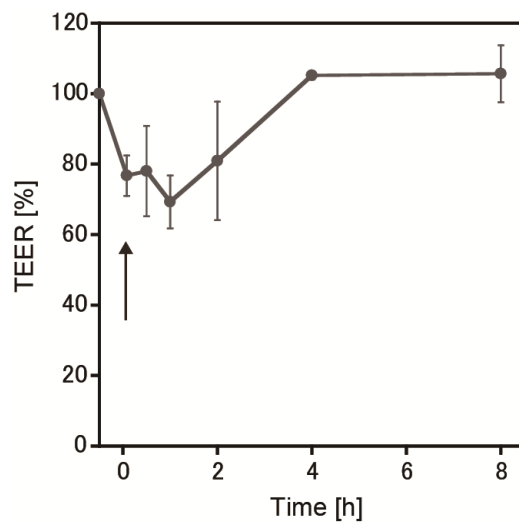

Figure S3. Time change of TEER induced by FUS exposure without MBs. An acoustic pressure of 320 kPa was used. The arrow indicates the time when FUS exposure was performed (defined as 0 h). N = 4

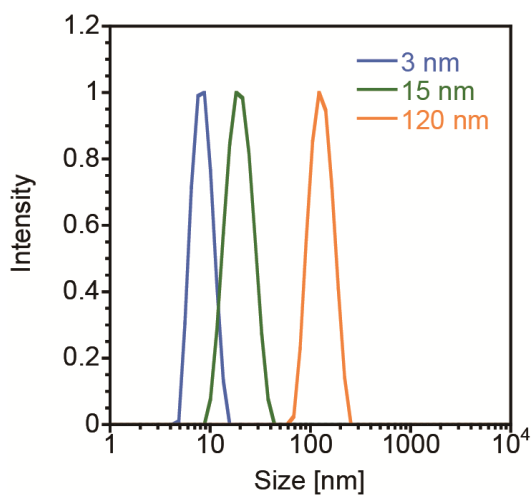

Figure S4. Hydrodynamic size distribution of the synthesized AuNPs as measured by DLS.

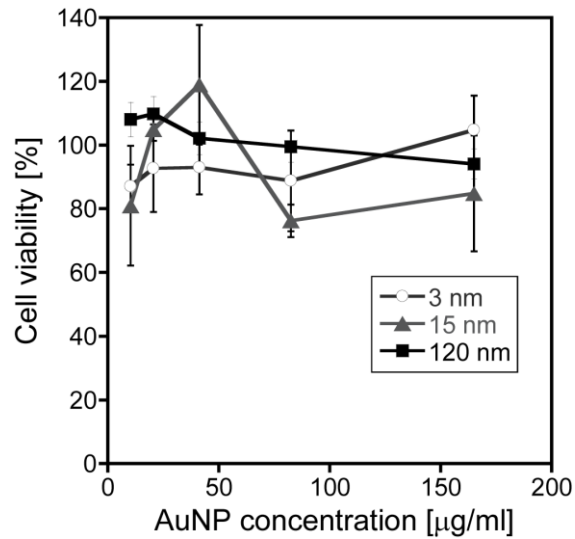

Figure S5. Cell viability of HUVECs incubated with 3, 15, and 120 nm AuNPs for 24h.

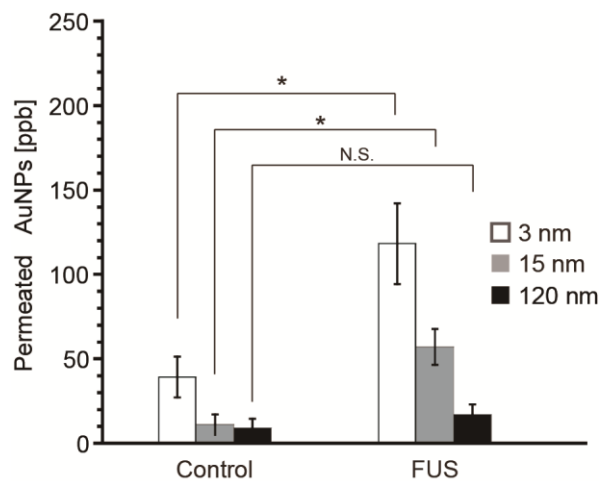

Figure S6. The quantity of 3, 15, and 120 nm AuNPs that permeated through the *in vitro* BBB model following FUS exposure without MBs. An acoustic pressure of 320 kPa was used. \*  $p < 0.05$ ; N.S. not significant.  $N = 4$ .

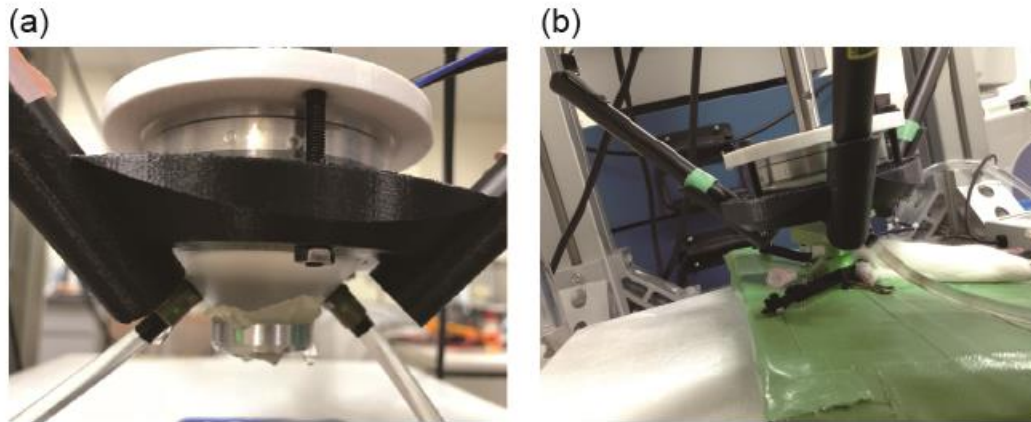

Figure S7. Apparatus for the *in vivo* investigation of BBB opening following intracranial FUS exposure. (a) The transducer used for intracranial FUS exposure. (b) A representative image showing intracranial FUS exposure in mice.



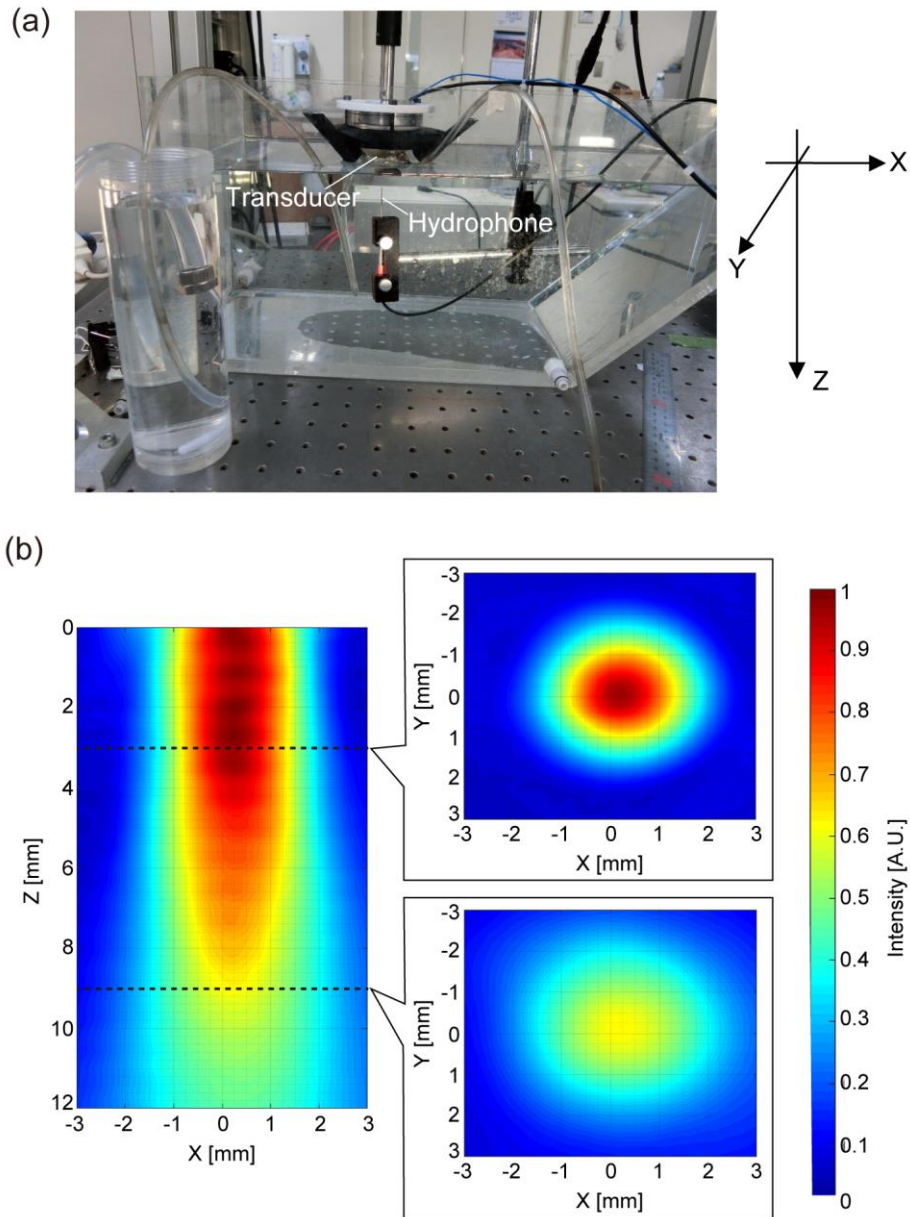

Figure S8. An ultrasound beam profile for the *in vivo* FUS exposure setup. (a) Apparatus used for the ultrasound beam profile measurement. (b) An ultrasound beam profile obtained by the measurement. Definitions of the X, Y, and Z axes are shown in (a).

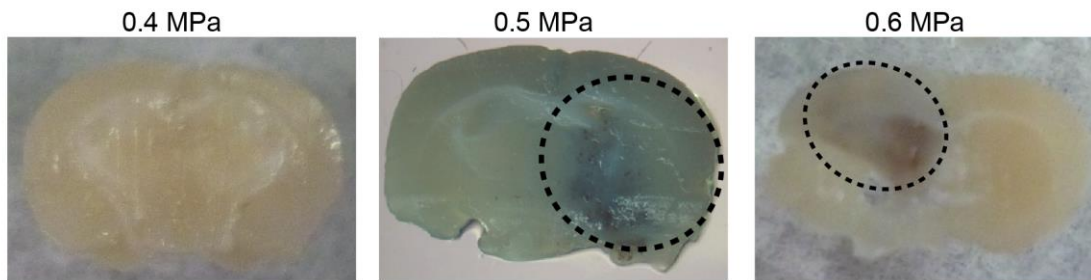

Figure S9. Brain sections of mice subjected to FUS with higher MB doses ( $3.0 \times 10^8$  bubbles/mouse). Dotted circles indicate areas where the permeation of trypan blue was observed.

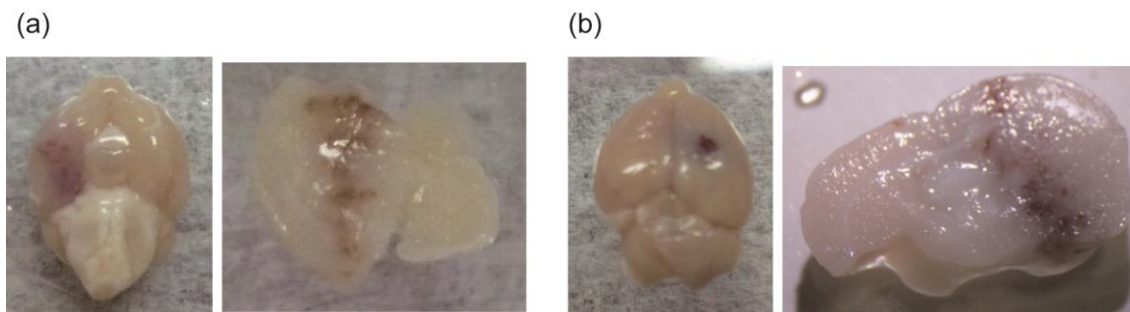

Figure S10. Severe bleeding following FUS exposure with acoustic pressure above 0.8 MPa. MB doses was (a)  $8.0 \times 10^7$  bubbles/mouse (b)  $3.0 \times 10^8$  bubbles/mouse.

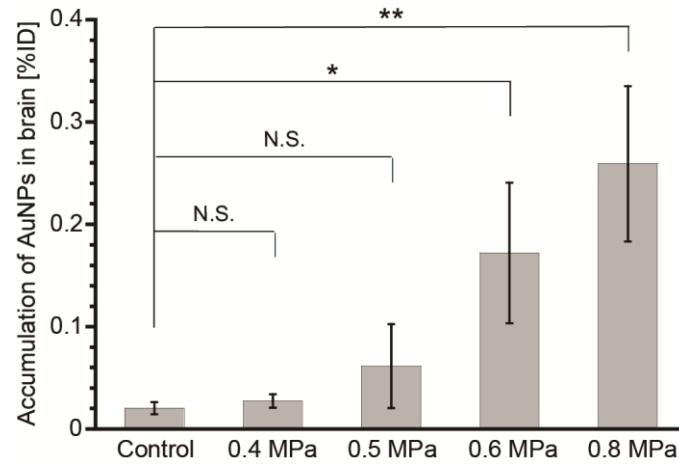

Figure S11. The effect of acoustic pressure on the amount of 3 nm AuNPs delivered into the brain assisted by FUS-induced BBB opening. The dose of MBs was  $3.0 \times 10^8$  bubbles/mouse. \*\*  $p < 0.01$ ; \*  $p < 0.05$ ; N.S. not significant. N = 4.

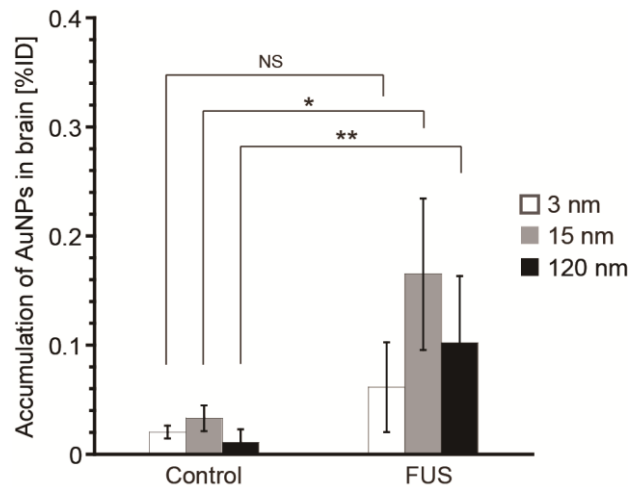

Figure S12. The amount of 3, 15, and 120 nm AuNPs delivered into the brain assisted by FUS-induced BBB opening with an MB dose of  $3.0 \times 10^8$  bubbles/mouse. The acoustic pressure was 0.5 MPa. \*\*  $p < 0.01$ ; \*  $p < 0.05$ ; N.S. not significant. N = 4.

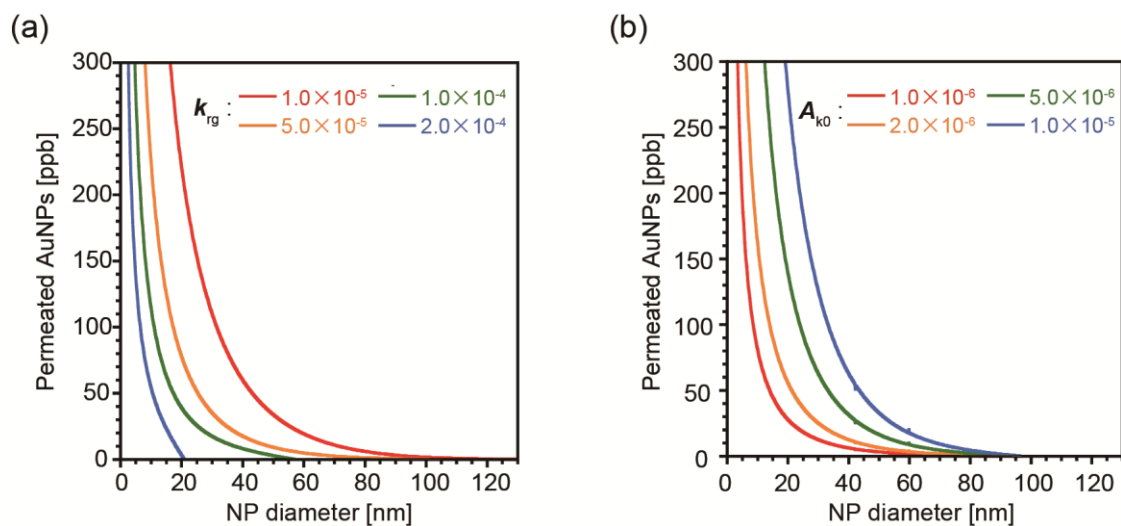

Figure S13. Effect of (a)  $k_{rg}$  and (b)  $A_{k0}$  on the size-dependent BBB permeation of AuNPs, as calculated based on a modified pore-flow model. The size of the gaps which opened in the BBB was assumed to be 100 nm.

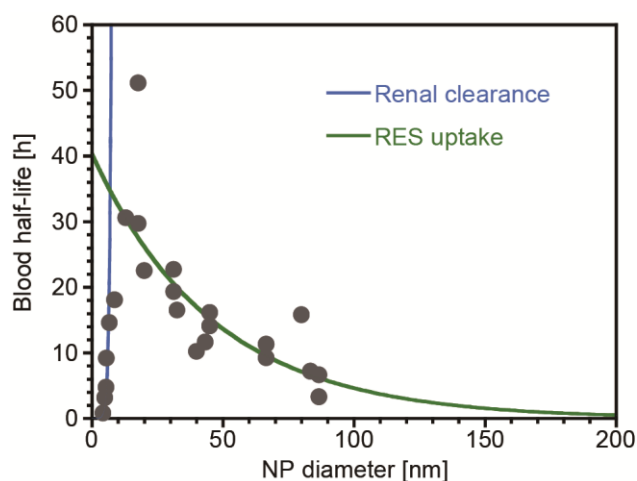

Figure S14. Effect of the size of nanoparticles on their blood half-lives in mice. Plots represent the previously reported blood half-lives of PEGylated nanoparticles, regardless of the type of material used.<sup>1-5</sup> Solid lines represent the fitted lines of the experimental plots obtained from eqs. S3 (blue) and S4 (green).

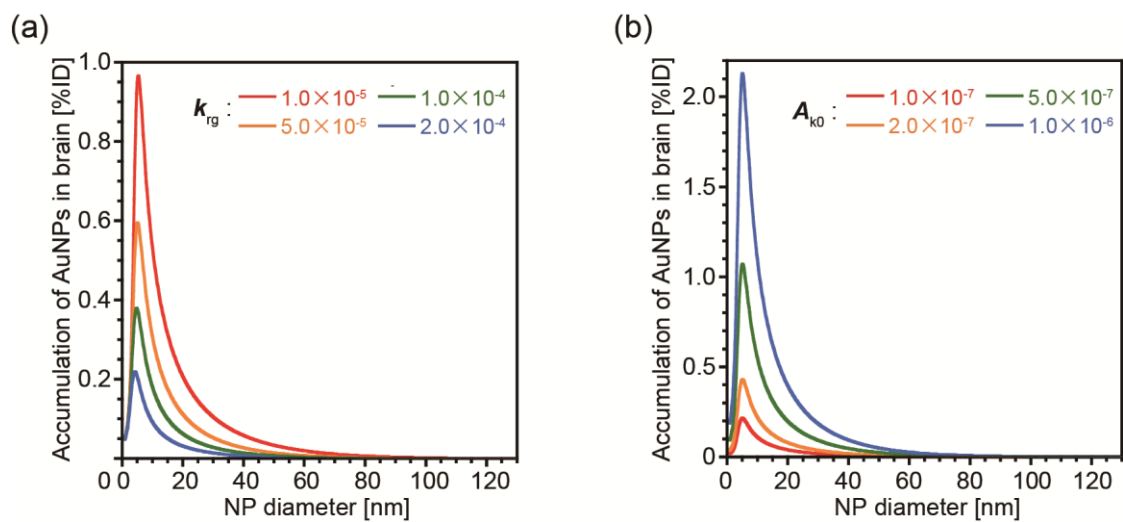

Figure S15. Effect of (a)  $k_{rg}$  and (b)  $A_{k0}$  on the size-dependent delivery of nanoparticles into the brain when assisted by FUS and calculated by coupling the BBB permeability model with nanoparticle elimination kinetics. The size of the gaps which opened in the BBB was assumed to be 100 nm.

Table S1 Summary of the characterization of synthesized AuNPs

| Size [nm] <sup>a</sup> | Zeta potential [mV] |                  | Surface density of conjugated PEG [/nm <sup>2</sup> ] <sup>b</sup> |
|------------------------|---------------------|------------------|--------------------------------------------------------------------|
|                        | Before PEGylation   | After PEGylation |                                                                    |
| 3.7 ± 0.5              | -34                 | -9               | 1.1                                                                |
| 14.4 ± 1.7             | -28                 | -7               | 1.6                                                                |
| 120 ± 7.2              | -38                 | -6               | 1.3                                                                |

<sup>a</sup> Diameter determined from TEM images

<sup>b</sup> Surface density of conjugated PEG estimated via Ellman's assay.

Table S2. Summary of parameters used for the model calculation

| Parameter                                 |            | Value                                                                             | Note                             |
|-------------------------------------------|------------|-----------------------------------------------------------------------------------|----------------------------------|
| Volume of chamber                         | $V_{in}$   | 100 $\mu$ l                                                                       |                                  |
| Volume of reservoir                       | $V_{out}$  | 600 $\mu$ l                                                                       |                                  |
| Area of semipermeable membrane            | $A_m$      | $3.3 \times 10^{-5} \text{ m}^2$                                                  |                                  |
| Volume of the brain                       | $V_b^*$    | $7.0 \times 10^{-7} \text{ m}^3$                                                  | From ref. 6                      |
| Volume of whole blood                     | $V_{pl}^*$ | 2.8 ml                                                                            | From ref. 7                      |
| Area of blood vessels in the brain        | $A_b^*$    | $1.2 \times 10^{-2} \text{ m}^2$                                                  | From ref. 8                      |
| Boltzmann constant                        | $K_b$      | $1.38 \times 10^{-23} \text{ J/K}$                                                |                                  |
| Temperature                               | $T$        | 298 K                                                                             |                                  |
| Viscosity                                 | $\eta$     | $8.9 \times 10^{-4} \text{ Pa s}$                                                 |                                  |
| Thickness of the BBB                      | $\Delta x$ | 100 nm                                                                            | From ref. 9                      |
| Rate constant for gap closing             | $k_{rg}$   | $5.6 \times 10^{-5} \text{ s}^{-1}$                                               | Estimated based on TEER          |
| Rate-constant parameter for elimination   | $a_1$      | $2.0 \times 10^{-3} \text{ s}$                                                    | Estimated by fitting to Fig. S11 |
| Rate-constant parameter for elimination   | $a_2$      | $4.0 \times 10 \text{ s}$                                                         | Estimated by fitting to Fig. S11 |
| Rate-constant parameter for elimination   | $b_1$      | $1.4 \text{ s}^{-1}$                                                              | Estimated by fitting to Fig. S11 |
| Rate-constant parameter for elimination   | $b_2$      | $2.2 \times 10^{-2} \text{ s}^{-1}$                                               | Estimated by fitting to Fig. S11 |
| Initial density of gaps opened in the BBB | $A_{k0}$   | $2.5 \times 10^{-6} \text{ (in vitro)}$<br>$2.6 \times 10^{-7} \text{ (in vivo)}$ | Fitting parameter                |

\*  $V_b$ ,  $V_{pl}$ , and  $A_b$  in mice were estimated via a body-weight based extrapolation from humans, assuming that the body weights of humans and mice are 60 kg and 35 g, respectively.

## References

1. Choi, H. S.; Liu, W.; Misra, P.; Tanaka, E.; Zimmer, J. P.; Iyiti Ipe, B.; Bawendi, M. G.; Frangioni, J. V. Renal clearance of quantum dots. *Nat. Biotechnol.* **2007**, *25*, 1165-70.
2. Perrault, S. D.; Walkey, C.; Jennings, T.; Fischer, H. C.; Chan, W. C. W. Mediating Tumor Targeting Efficiency of Nanoparticles Through Design. *Nano Lett.* **2009**, *9*, 1909-1915.
3. Cho, W. S.; Cho, M.; Jeong, J.; Choi, M.; Cho, H. Y.; Han, B. S.; Kim, S. H.; Kim, H. O.; Lim, Y. T.; Chung, B. H.; Jeong, J. Acute toxicity and pharmacokinetics of 13 nm-sized PEG-coated gold nanoparticles. *Toxicol. Appl. Pharmacol.* **2009**, *236*, 16-24.
4. Hong, G.; Robinson, J. T.; Zhang, Y.; Diao, S.; Antaris, A. L.; Wang, Q.; Dai, H. In vivo fluorescence imaging with Ag<sub>2</sub>S quantum dots in the second near-infrared region. *Angew. Chem. Int. Ed. Engl.* **2012**, *51*, 9818-21.
5. Zhang, G.; Yang, Z.; Lu, W.; Zhang, R.; Huang, Q.; Tian, M.; Li, L.; Liang, D.; Li, C. Influence of anchoring ligands and particle size on the colloidal stability and in vivo biodistribution of polyethylene glycol-coated gold nanoparticles in tumor-xenografted mice. *Biomaterials* **2009**, *30*, 1928-36.
6. Allen, J.; Damasio, H.; Grabowski T. J.; Normal Neuroanatomical Variation in the Human Brain: An MRI-Volumetric Study. *Am. J. Phys. Anthropol.* **2002**, *118*, 341-58.
7. Riches A. C.; Sharp J. G.; Thomas D. B.; Smith V. Blood volume determination in the mouse. *J. Physiol.* **1973**, *228*, 279-84.
8. Pardridge W. M. Blood-brain barrier delivery. *Drug Discov. Today* **2007**, *12*, 54-61.
9. Wong, A. D.; Ye M.; Levy A. F.; Rothstein J. D.; Bergles D. E.; Searson P. C. The blood-brain barrier: an engineering perspective. *Front. Neuroeng.* **2013**, *6*, 1-22.
